# Supplementary material
Source: publisher site journal article supplement (https://www.spandidos-publications.com/7936/downloadSupplementary)
Supplement: Supplementary file 1 [file downloadSupplementary]

**Table S1.** Target genes and primer sequences.

| Gene  | Forward primer       | Reverse primer       |
|-------|----------------------|----------------------|
| GAPDH | TGACCCCTTCATTGACCTCA | TGACAAGCTTCCCGTTCTCA |
| TGIF2 | CCCAAGGAGTCGGTGAAGAT | CGGGCATTGATGAACCAGTT |
| ID1   | GCTGTTACTCACGCCTCAAG | CTCCA ACTGAAGGTCCTGA |
| BMP2  | ATTCCCCGTGACCAGACTTT | CCACTTCCACCACGAATCCA |

**Table SII.** Cell inhibition rates of compounds 1-8 and 10.

| Compound<br>(5.0 $\mu$ M) | Inhibition rate (%) |                  |                  |                  |                  |                  |
|---------------------------|---------------------|------------------|------------------|------------------|------------------|------------------|
|                           | PC3                 | LNCaP            | HeLa             | SiHa             | K562             | HEL              |
| 1                         | 22.52 $\pm$ 2.59    | 10.91 $\pm$ 1.16 | 49.48 $\pm$ 6.21 | 43.26 $\pm$ 9.67 | 14.82 $\pm$ 8.54 | 8.91 $\pm$ 4.44  |
| 2                         | 15.89 $\pm$ 3.45    | 8.89 $\pm$ 6.45  | 14.42 $\pm$ 5.65 | 40.01 $\pm$ 9.12 | 27.11 $\pm$ 5.51 | 8.80 $\pm$ 5.89  |
| 3                         | 14.45 $\pm$ 2.36    | 4.45 $\pm$ 4.12  | 29.34 $\pm$ 7.21 | 20.46 $\pm$ 3.17 | 36.89 $\pm$ 2.99 | 3.96 $\pm$ 2.77  |
| 4                         | 20.34 $\pm$ 3.89    | 28.87 $\pm$ 9.33 | 30.17 $\pm$ 7.23 | 10.77 $\pm$ 8.33 | 16.99 $\pm$ 8.56 | 14.78 $\pm$ 8.44 |
| 5                         | 7.72 $\pm$ 1.17     | 11.95 $\pm$ 7.45 | 6.74 $\pm$ 2.76  | 31.22 $\pm$ 6.97 | 14.45 $\pm$ 6.22 | 10.90 $\pm$ 6.10 |
| 6                         | 2.77 $\pm$ 2.36     | 37.08 $\pm$ 3.32 | 30.12 $\pm$ 3.76 | 33.98 $\pm$ 6.88 | 30.76 $\pm$ 9.48 | 23.70 $\pm$ 4.92 |
| 7                         | 8.85 $\pm$ 4.90     | 11.90 $\pm$ 8.36 | 6.74 $\pm$ 3.56  | 31.20 $\pm$ 3.98 | 34.80 $\pm$ 6.32 | 12.90 $\pm$ 9.32 |
| 8                         | 2.47 $\pm$ 1.32     | 20.91 $\pm$ 5.52 | 23.84 $\pm$ 3.52 | 41.17 $\pm$ 6.37 | 9.77 $\pm$ 6.21  | 17.98 $\pm$ 8.39 |
| 10                        | 22.93 $\pm$ 7.42    | 13.65 $\pm$ 9.34 | 38.45 $\pm$ 3.58 | 15.90 $\pm$ 2.16 | 42.55 $\pm$ 7.99 | 17.87 $\pm$ 8.21 |

Note: Compound 9 was excluded from testing due to experimental contamination and reportedly low inhibitory activity in literature (90).

**Table III.** Optimization model results for molecular docking.

| Target Symbol | Protein databank ID | Binding Affinity (kcal/mol) |
|---------------|---------------------|-----------------------------|
| TGIF-2        | 2DMN                | -7.3                        |
| ID1           | 2P57                | -6.4                        |
| BMP2          | 4MID                | -7.1                        |
